# Supplementary material for: Chemically defined polyethylene glycol siRNA conjugates with enhanced gene silencing effect
Source: PubMed Central journal article supplement (PMC3994277; doi:10.1016/j.bmc.2014.02.004), 2014-04-01
Supplement: mmc1.pdf [file mmc1.pdf]

## Chemically defined polyethylene glycol siRNA conjugates with enhanced gene silencing effect

Zuzana Gažiová , Volker Baumann, Anna-Maria Winkler and Johannes Winkler

### qPCR information

| <i>gene name</i>                                                  | <i>NCBI Acc. Nr.</i> | <i>amplicon length (bp, verified on agarose gel)</i> | <i>melting temperature (T<sub>m</sub>) °C</i> | <i>qPCR efficiency</i> | <i>slope</i> | <i>Y intercept</i> | <i>for/rev</i> | <i>Sequence 5' - 3'</i> | <i>exon spanning</i> |
|-------------------------------------------------------------------|----------------------|------------------------------------------------------|-----------------------------------------------|------------------------|--------------|--------------------|----------------|-------------------------|----------------------|
| B-cell CLL/lymphoma 2 (BCL2)                                      | NM_000633            | 146                                                  | 92.07                                         | 0.864                  | -3.794       | 43.20              | for            | CCTGGTGGACAACATCGC      | one exon, no introns |
|                                                                   |                      |                                                      |                                               |                        |              |                    | rev            | GAGACAGCCAGGAGAAATCA    |                      |
| Chemokine (C-X-C motif) receptor 4 (CXCR4)                        | NM_001008540         | 125                                                  | 85.45                                         | 0.946                  | -3.680       | 38.90              | for            | CGTGGAACGTTTTTCCTGTT    | one exon, no introns |
|                                                                   |                      |                                                      |                                               |                        |              |                    | rev            | GGTGCTGAAATCAACCCACT    |                      |
| Polymerase (RNA) II (DNA directed) polypeptide A, 220kDa (POLR2A) | NM_000937            | 133                                                  | 87.34                                         | 1.078                  | -3.439       | 34.55              | For            | ATGCTGGTTTTGGTGACGACT   | 21 -22               |
|                                                                   |                      |                                                      |                                               |                        |              |                    | Rev            | TCCATCTTGTCCACCACCTCT   |                      |

## Calculation of PCR efficiency

| Gene name                                                                  | cDNA<br>(2 µl 1:10<br>dilution) | 1:80 dilution | 1:640<br>dilution | 1:5120<br>dilution | 1:40980<br>dilution | RT-<br>(2 µl 1:10<br>diluted<br>cDNA) | RT- control<br>in % from<br>RT+,<br>limit < 1.5% | No template<br>control<br>(NTC) | NTC in %<br>from RT+,<br>limit < 1.5% |
|----------------------------------------------------------------------------|---------------------------------|---------------|-------------------|--------------------|---------------------|---------------------------------------|--------------------------------------------------|---------------------------------|---------------------------------------|
| B-cell<br>CLL/lymphoma 2<br>(BCL2)                                         | 29.88                           | 33.10         | 36.39             | 40.25              | 43.00               | 41.81                                 | 0.026%                                           | 44.00                           | 0.006%                                |
| Chemokine (C-X-C<br>motif) receptor 4<br>(CXCR4)                           | 27.01                           | 30.08         | 33.10             | 36.42              | n/a                 | 33.10                                 | 1.473%                                           | 43.00                           | 0.002%                                |
| Polymerase (RNA)<br>II (DNA directed)<br>polypeptide A,<br>220kDa (POLR2A) | 23.36                           | 26.29         | 29.29             | 31.84              | n/a                 | 32.18                                 | 0.254%                                           | 34.60                           | 0.047%                                |
